# Supplementary material for: Predictors of Mortality in Patients With Biopsy‐Proven Viral Myocarditis: 10‐Year Outcome Data
Source: PubMed Central journal article supplement — J Am Heart Assoc. 2020 Aug 13;9(16):e015351. doi: 10.1161/JAHA.119.015351 (PMC7660832; doi:10.1161/jaha.119.015351), 2020-08-13
Supplement: JAH3-9-e015351-s001.pdf [file JAH3-9-e015351-s001.pdf]

# **SUPPLEMENTAL MATERIAL**

**Table S1. Predictors of All-Cause Death in LGE-positive patients.**

|                                  | <b>No Event<br/>(n=46)</b> | <b>All-Cause Death<br/>(n=55)</b> | <b>P Value</b>   |
|----------------------------------|----------------------------|-----------------------------------|------------------|
| <b>LGE mass</b>                  |                            |                                   |                  |
| LGE mass, g                      | 3.4 (2.7 – 4.7)            | 12.2 (7.8 – 25.0)                 | <b>&lt;0.001</b> |
| LGE, % of LV mass                | 3.0 (2.6 – 3.8)            | 8.4 (4.3 – 15.2)                  | <b>&lt;0.001</b> |
| Segments with LGE                | 3 (2 – 4)                  | 5 (4 – 7)                         | <b>&lt;0.001</b> |
| <b>LGE location</b>              |                            |                                   |                  |
| Anterior                         | 5 (10.9)                   | 34 (61.8)                         | <b>&lt;0.001</b> |
| Lateral                          | 34 (73.9)                  | 21 (38.2)                         | <b>&lt;0.001</b> |
| Inferior                         | 29 (63.0)                  | 21 (49.5)                         | <b>0.013</b>     |
| Septal                           | 5 (10.9)                   | 40 (72.7)                         | <b>&lt;0.001</b> |
| Anteroseptal cluster             | 3 (6.5)                    | 33 (60.0)                         | <b>&lt;0.001</b> |
| Inferolateral cluster            | 26 (56.5)                  | 19 (34.5)                         | <b>0.027</b>     |
| Anteroseptal + inferolateral     | 1 (2.2)                    | 7 (12.7)                          | 0.05             |
| <b>LGE distribution</b>          |                            |                                   |                  |
| Linear                           | 24 (52.2)                  | 29 (52.7)                         | 0.96             |
| Patchy                           | 15 (32.6)                  | 12 (21.8)                         | 0.22             |
| Diffuse                          | 4 (8.7)                    | 10 (18.2)                         | 0.17             |
| <b>LGE pattern</b>               |                            |                                   |                  |
| Epicardial                       | 30 (65.2)                  | 9 (16.4)                          | <b>&lt;0.001</b> |
| Midwall                          | 10 (21.7)                  | 37 (67.3)                         | <b>&lt;0.001</b> |
| Other (transmural/diffuse)       | 6 (13.0)                   | 8 (14.5)                          | 0.83             |
| Age, years                       | 47 (33 - 63)               | 63 (49 - 69)                      | <b>0.006</b>     |
| NYHA >2                          | 14 (30.4)                  | 34 (61.8)                         | <b>0.002</b>     |
| BNP                              | 154 (59 – 601)             | 499 (136 – 1348)                  | <b>0.019</b>     |
| Troponin positive                | 16 (34.8)                  | 14 (25.5)                         | 0.307            |
| LVEDV indexed, ml/m <sup>2</sup> | 76 (60 – 106)              | 112 (86 – 155)                    | <b>&lt;0.001</b> |
| LVEF, %                          | 55 (33 – 62)               | 34 (21 - 44)                      | <b>&lt;0.001</b> |

Values are n (%) or median (interquartile range).

LGE = late gadolinium enhancement; LV = left ventricular; NYHA = New York Heart Association; BNP = brain natriuretic peptide; LVEDV = left ventricular end-diastolic volume; LVEF = left ventricular ejection fraction

**Table S2. Predictors of Cardiac Death in LGE-positive patients.**

|                                  | No Event<br>(n=46) | Cardiac Death<br>(n=40) | P Value          |
|----------------------------------|--------------------|-------------------------|------------------|
| LGE mass                         |                    |                         |                  |
| LGE mass, g                      | 3.4 (2.7 – 4.7)    | 12.3 (9.5 – 25.2)       | <b>&lt;0.001</b> |
| LGE, % of LV mass                | 3.0 (2.6 – 3.8)    | 8.3 (6.4 – 15.7)        | <b>&lt;0.001</b> |
| Segments with LGE                | 3 (2 – 4)          | 5 (4 – 8)               | <b>&lt;0.001</b> |
| LGE location                     |                    |                         |                  |
| Anterior                         | 5 (10.9)           | 24 (60.0)               | <b>&lt;0.001</b> |
| Lateral                          | 34 (73.9)          | 16 (40.0)               | <b>0.001</b>     |
| Inferior                         | 29 (63.0)          | 15 (37.5)               | <b>0.018</b>     |
| Septal                           | 5 (10.9)           | 30 (75.0)               | <b>&lt;0.001</b> |
| Anteroseptal cluster             | 3 (6.5)            | 23 (57.5)               | <b>&lt;0.001</b> |
| Inferolateral cluster            | 26 (56.5)          | 15 (37.5)               | 0.08             |
| Anteroseptal + inferolateral     | 1 (2.2)            | 6 (15.0)                | <b>0.03</b>      |
| LGE distribution                 |                    |                         |                  |
| Linear                           | 24 (52.2)          | 19 (47.5)               | 0.67             |
| Patchy                           | 15 (32.6)          | 9 (22.5)                | 0.30             |
| Diffuse                          | 4 (8.7)            | 8 (20.0)                | 0.13             |
| LGE pattern                      |                    | 30 (65.2)               |                  |
| Epicardial                       | 30 (65.2)          | 6 (12.0)                | <b>&lt;0.001</b> |
| Midwall                          | 10 (21.7)          | 26 (65.0)               | <b>&lt;0.001</b> |
| Other (transmural/diffuse)       | 6 (13.0)           | 17 (34.0)               | <b>0.002</b>     |
| Age, years                       | 47 (33 - 63)       | 62 (48 - 69)            | <b>0.008</b>     |
| NYHA >2                          | 14 (30.4)          | 29 (58)                 | <b>0.007</b>     |
| BNP                              | 154 (59 – 601)     | 487 (116 – 1266)        | 0.065            |
| Troponin positive                | 16 (34.8)          | 13 (26)                 | 0.349            |
| LVEDV indexed, ml/m <sup>2</sup> | 76 (60 – 106)      | 109 (87 – 141)          | <b>0.001</b>     |
| LVEF, %                          | 55 (33 – 62)       | 35 (21 - 44)            | <b>&lt;0.001</b> |

Values are n (%) or median (interquartile range).

LGE = late gadolinium enhancement; LV = left ventricular; NYHA = New York Heart Association; BNP = brain natriuretic peptide; LVEDV = left ventricular end-diastolic volume; LVEF = left ventricular ejection fraction

**Table S3. Predictors of SCD in LGE-positive patients.**

|                                  | <b>No Event<br/>(n=46)</b> | <b>SCD<br/>(n=19)</b> | <b>P Value</b>   |
|----------------------------------|----------------------------|-----------------------|------------------|
| <b>LGE mass</b>                  |                            |                       |                  |
| LGE mass, g                      | 3.4 (2.7 – 4.7)            | 12.0 (7.8 – 22.5)     | <b>0.001</b>     |
| LGE, % of LV mass                | 3.0 (2.6 – 3.8)            | 7.3 (4.2 – 15.7)      | <b>0.004</b>     |
| Segments with LGE                | 3 (2 – 4)                  | 5 (3 – 7)             | <b>&lt;0.001</b> |
| <b>LGE location</b>              |                            |                       |                  |
| Anterior                         | 5 (10.9)                   | 11 (57.9)             | <b>&lt;0.001</b> |
| Lateral                          | 34 (73.9)                  | 8 (42.1)              | <b>0.015</b>     |
| Inferior                         | 29 (63.0)                  | 7 (36.8)              | 0.053            |
| Septal                           | 5 (10.9)                   | 12 (30.0)             | <b>&lt;0.001</b> |
| Anteroseptal cluster             | 3 (6.5)                    | 10 (52.6)             | <b>&lt;0.001</b> |
| Inferolateral cluster            | 26 (56.5)                  | 7 (36.8)              | 0.15             |
| Anteroseptal + inferolateral     | 1 (2.2)                    | 3 (15.8)              | <b>0.038</b>     |
| <b>LGE distribution</b>          |                            |                       |                  |
| Linear                           | 24 (52.2)                  | 10 (52.6)             | 0.97             |
| Patchy                           | 15 (32.6)                  | 3 (15.8)              | 0.17             |
| Diffuse                          | 4 (8.7)                    | 4 (21.1)              | 0.17             |
| <b>LGE pattern</b>               |                            |                       |                  |
| Epicardial                       | 30 (65.2)                  | 4 (21.1)              | <b>0.001</b>     |
| Midwall                          | 10 (21.7)                  | 9 (47.4)              | <b>0.039</b>     |
| Other (transmural/diffuse)       | 6 (13.0)                   | 6 (31.6)              | 0.08             |
| Age, years                       | 47 (33 - 63)               | 61 (44 - 65)          | 0.159            |
| NYHA >2                          | 14 (30.4)                  | 12 (63.2)             | <b>0.014</b>     |
| BNP                              | 154 (59 – 601)             | 277 (105 – 998)       | 0.270            |
| Troponin positive                | 16 (34.8)                  | 6 (31.6)              | 0.804            |
| LVEDV indexed, ml/m <sup>2</sup> | 76 (60 – 106)              | 110 (78 – 126)        | <b>0.018</b>     |
| LVEF, %                          | 55 (33 – 62)               | 32 (22 - 46)          | <b>0.001</b>     |

Values are n (%) or median (interquartile range). SCD – Sudden cardiac death, LGE = late gadolinium enhancement; LV = left ventricular; NYHA = New York Heart Association; BNP = brain natriuretic peptide; LVEDV = left ventricular end-diastolic volume; LVEF = left ventricular ejection fraction
